# Supplementary material
Source: publisher site journal article supplement (https://www.spandidos-publications.com/3279/downloadSupplementary)

Figure S1. Transfection efficiency of si-ADAM8, ADAM8-overexpression vector, miR-221-5p mimic and miR-221-5p inhibitor. (A) Transfection efficiency of si-ADAM8 and ADAM8-overexpression vector. (B) The transfection efficiency of miR-221-5p mimic and miR-221-5p inhibitor. \*\* $P < 0.001$ , ## $P < 0.001$ . si, small interfering RNA; si-NC, negative control of siRNA; OE-NC, pcDNA 3.1 empty vector; ADAM8-OE, ADAM8 overexpression vector; miR, microRNA.

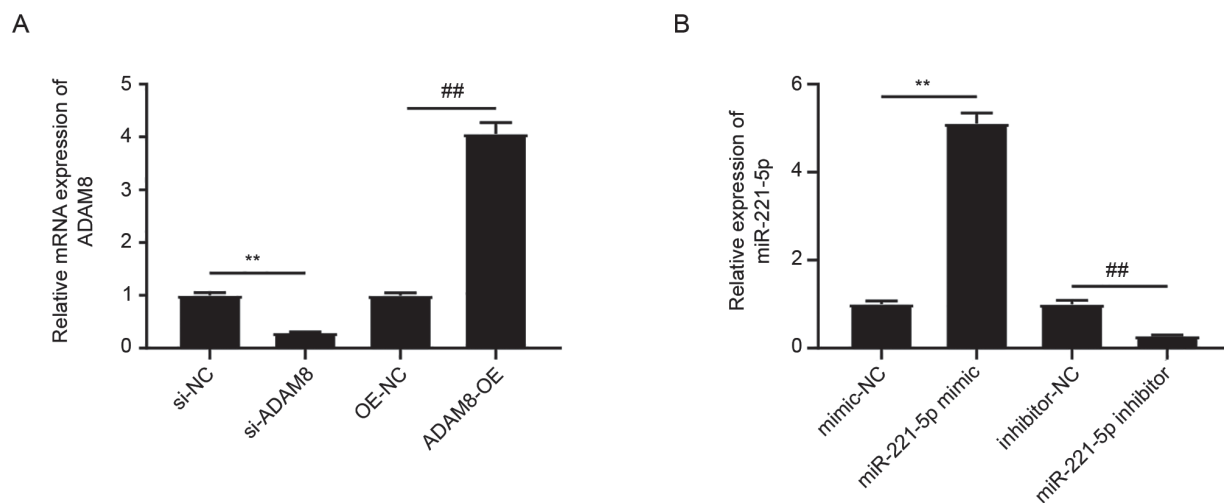

Supplement: Supplementary file 1 [file downloadSupplementary]
